# Supplementary material for: PLK1 is required for chromosome compaction and microtubule organization in mouse oocytes
Source: PubMed Central journal article supplement — Mol Biol Cell. 2020 Jun 1;31(12):1206–17. doi: 10.1091/mbc.E19-12-0701 (PMC7353151; doi:10.1091/mbc.e19-12-0701), 2020-06-01

# Supplemental Materials

*Molecular Biology of the Cell*

Little and Jordan

# Supplemental Figure S1

**A**

Analysis of Cre excision efficiency

| Breeding pairs                                          | Offspring genotype distribution |                    |                   |          |
|---------------------------------------------------------|---------------------------------|--------------------|-------------------|----------|
|                                                         | <i>Plk1</i> +/+                 | <i>Plk1</i> +/flox | <i>Plk1</i> +/del | Total    |
| ♀ <i>Plk1</i> +/flox, <i>Zp3-Cre</i><br>x ♂ wild-type   | 44%<br>(63 pups)                | 0%<br>(0 pups)     | 56%<br>(80 pups)  | 143 pups |
| ♀ <i>Plk1</i> +/flox, <i>Spo11-Cre</i><br>x ♂ wild-type | 46%<br>(67 pups)                | 10%<br>(14 pups)   | 44%<br>(63 pups)  | 144 pups |

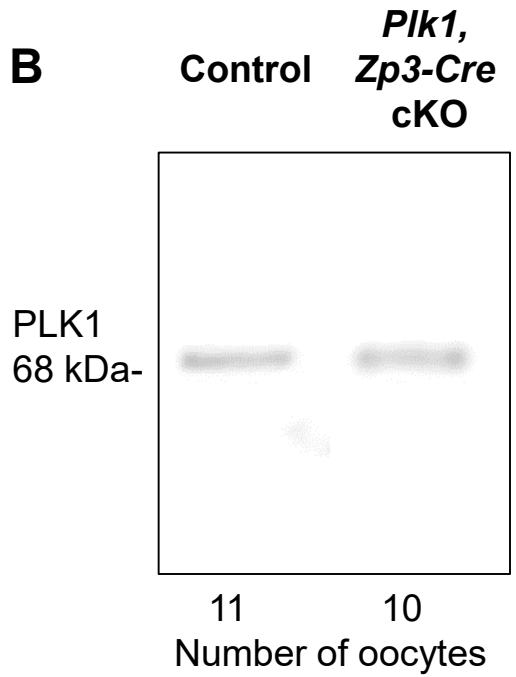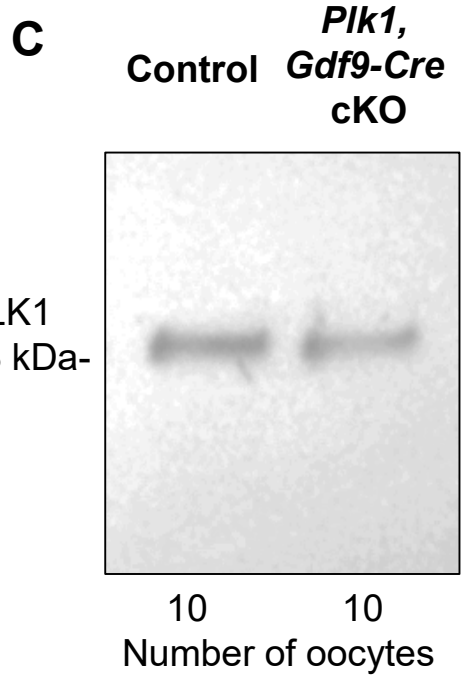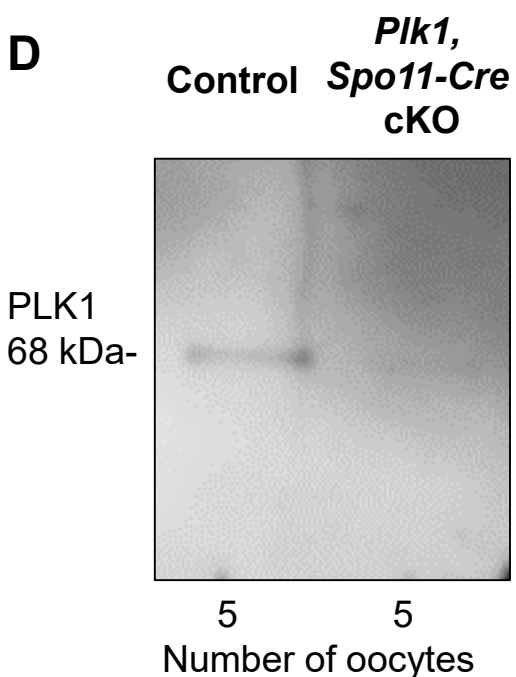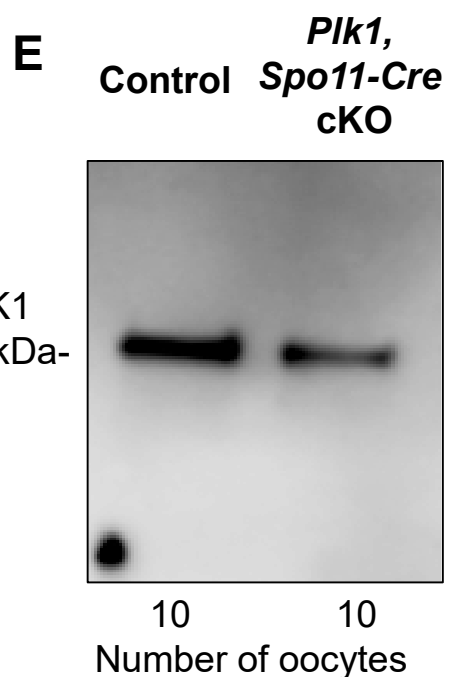

Supplement: mbc-31-1206-s001.pdf [file mbc-31-1206-s001.pdf]
